# Supplementary material for: Staphylococcus spp. Causatives of Infections and Carrier of blaZ, femA, and mecA Genes Associated with Resistance
Source: MDPI journal article supplement (doi:10.3390/antibiotics12040671), 2023-03-29
Supplement: s1 [file s1]

**Table S1.** *Staphylococcus* spp. tested for chromosomal and plasmid *blaZ*, *femA* and *mecA* genes and oxacillin and penicillin G resistance profile

| Sample number | Species                                               | Chromosomal |             |             | Plasmid     |             |             | Resistance |              |
|---------------|-------------------------------------------------------|-------------|-------------|-------------|-------------|-------------|-------------|------------|--------------|
|               |                                                       | <i>blaZ</i> | <i>femA</i> | <i>mecA</i> | <i>blaZ</i> | <i>femA</i> | <i>mecA</i> | Oxacillin  | Penicillin G |
| 1.1           | <i>Staphylococcus haemolyticus</i>                    | -           | -           | -           | -           | -           | -           | Negative   | Negative     |
| 1.2           | <i>Staphylococcus intermedius</i>                     | Negative    | -           | -           | Negative    | Negative    | Negative    | Negative   | Positive     |
| 1.3           | <i>Staphylococcus haemolyticus</i>                    | Negative    | -           | Positive    | -           | Positive    | Negative    | Positive   | Negative     |
| 1.4           | <i>Staphylococcus haemolyticus</i>                    | Negative    | Negative    | -           | Negative    | Positive    | Negative    | Negative   | Positive     |
| 1.5           | <i>Staphylococcus aureus</i> subsp. <i>aureus</i>     | Negative    | Negative    | Negative    | Negative    | Negative    | Positive    | Negative   | Positive     |
| 1.6           | <i>Staphylococcus aureus</i> subsp. <i>aureus</i>     | -           | -           | -           | -           | -           | -           | Negative   | Negative     |
| 1.7           | <i>Staphylococcus haemolyticus</i>                    | Negative    | Negative    | Negative    | Negative    | Negative    | Negative    | Negative   | Positive     |
| 1.8           | <i>Staphylococcus haemolyticus</i>                    | Negative    | Positive    | Negative    | Negative    | Negative    | Negative    | Negative   | Positive     |
| 1.9           | <i>Staphylococcus carnosus</i> subsp. <i>carnosus</i> | Negative    | Negative    | -           | Negative    | Negative    | Negative    | Positive   | Negative     |
| 1.10          | <i>Staphylococcus haemolyticus</i>                    | Negative    | Negative    | Negative    | Positive    | Positive    | Negative    | Negative   | Negative     |
| 1.11          | <i>Staphylococcus aureus</i> subsp. <i>aureus</i>     | Negative    | Negative    | Negative    | -           | Positive    | Positive    | Negative   | Positive     |
| 1.12          | <i>Staphylococcus carnosus</i> subsp. <i>carnosus</i> | Negative    | Positive    | Negative    | Positive    | Positive    | Positive    | Negative   | Negative     |
| 2.1           | <i>Staphylococcus intermedius</i>                     | Negative    | Positive    | Negative    | Negative    | Positive    | Negative    | Negative   | Negative     |
| 2.2           | <i>Staphylococcus haemolyticus</i>                    | Negative    | Negative    | Negative    | Negative    | Negative    | Negative    | Positive   | Positive     |
| 2.3           | <i>Staphylococcus haemolyticus</i>                    | Negative    | -           | Negative    | Negative    | Negative    | Negative    | Positive   | Negative     |
| 2.4           | <i>Staphylococcus haemolyticus</i>                    | Negative    | Negative    | Negative    | -           | Negative    | Negative    | Positive   | Negative     |
| 2.5           | <i>Staphylococcus haemolyticus</i>                    | Negative    | -           | Negative    | Negative    | Negative    | -           | Positive   | Positive     |
| 2.6           | <i>Staphylococcus haemolyticus</i>                    | Negative    | -           | Negative    | Negative    | Negative    | Negative    | Positive   | Negative     |
| 2.7           | <i>Staphylococcus haemolyticus</i>                    | -           | Positive    | Negative    | Negative    | Positive    | Negative    | Positive   | Negative     |
| 2.8           | <i>Staphylococcus haemolyticus</i>                    | Negative    | -           | Negative    | -           | Positive    | Negative    | Positive   | Positive     |
| 2.9           | <i>Staphylococcus aureus</i> subsp. <i>aureus</i>     | Negative    | Negative    | Negative    | Negative    | Negative    | Negative    | Positive   | Positive     |
| 3.1           | <i>Staphylococcus haemolyticus</i>                    | -           | -           | -           | -           | -           | -           | Negative   | Positive     |
| 3.2           | <i>Staphylococcus haemolyticus</i>                    | -           | -           | -           | -           | -           | -           | Positive   | Positive     |
| 3.3           | <i>Staphylococcus agnetis</i>                         | Negative    | -           | Negative    | Positive    | -           | Positive    | Positive   | Positive     |
| 3.4           | <i>Staphylococcus haemolyticus</i>                    | Negative    | Negative    | Negative    | Negative    | -           | -           | Positive   | Positive     |
| 3.5           | <i>Staphylococcus carnosus</i> subsp. <i>utilis</i>   | Negative    | -           | Negative    | Positive    | Positive    | Negative    | Positive   | Positive     |
| 3.6           | <i>Staphylococcus carnosus</i> subsp. <i>utilis</i>   | -           | -           | Negative    | Negative    | Negative    | Negative    | Positive   | Negative     |
| 3.7           | <i>Staphylococcus haemolyticus</i>                    | -           | Negative    | Negative    | -           | -           | Negative    | Positive   | Positive     |
| 3.8           | <i>Staphylococcus auricularis</i>                     | -           | -           | -           | -           | -           | -           | Positive   | Positive     |
| 4.1           | <i>Staphylococcus haemolyticus</i>                    | -           | -           | -           | -           | -           | -           | Positive   | Positive     |
| 4.2           | <i>Staphylococcus agnetis</i>                         | Negative    | -           | Negative    | -           | -           | -           | Positive   | Positive     |
| 4.3           | <i>Staphylococcus haemolyticus</i>                    | -           | -           | -           | -           | -           | -           | Positive   | Positive     |
| 4.4           | <i>Staphylococcus auricularis</i>                     | -           | -           | Negative    | -           | -           | -           | Positive   | Positive     |
| 4.5           | <i>Staphylococcus auricularis</i>                     | -           | -           | -           | -           | -           | -           | Positive   | Positive     |
| 4.6           | <i>Staphylococcus epidermidis</i>                     | -           | Positive    | -           | Negative    | -           | -           | Positive   | Positive     |
| 5.1           | <i>Staphylococcus carnosus</i> subsp. <i>utilis</i>   | -           | -           | -           | -           | -           | -           | Positive   | Positive     |
| 5.2           | <i>Staphylococcus carnosus</i> subsp. <i>utilis</i>   | Negative    | Positive    | Negative    | Negative    | Positive    | Positive    | Positive   | Positive     |
| 5.3           | <i>Staphylococcus haemolyticus</i>                    | -           | Positive    | -           | -           | -           | -           | Positive   | Positive     |
| 5.4           | <i>Staphylococcus auricularis</i>                     | -           | -           | Negative    | -           | -           | -           | Negative   | Negative     |

|     |                                   |          |          |          |          |          |          |          |          |
|-----|-----------------------------------|----------|----------|----------|----------|----------|----------|----------|----------|
| 5.7 | <i>Staphylococcus agnetis</i>     | -        | Negative | -        | -        | -        | -        | Positive | Positive |
| 5.8 | <i>Staphylococcus auricularis</i> | Negative | Positive | Negative | Negative | -        | Negative | Positive | Positive |
| 6.1 | <i>Staphylococcus pasteurii</i>   | Negative | Positive | Negative | Negative | Negative | Negative | Negative | Positive |
| 6.2 | <i>Staphylococcus intermedius</i> | Negative | Positive | Negative | Negative | Positive | Negative | Positive | Positive |
| 6.3 | <i>Staphylococcus intermedius</i> | Negative | Positive | Negative | Negative | Negative | Negative | Positive | Positive |
| 6.4 | <i>Staphylococcus intermedius</i> | Negative | Positive | -        | Negative | Negative | Positive | Positive | Negative |
| 6.5 | <i>Staphylococcus intermedius</i> | Negative | Positive | Negative | Negative | Negative | Negative | Negative | Negative |
| 8.1 | <i>Staphylococcus auricularis</i> | Negative | Negative | Negative | Positive | Positive | Negative | Positive | Positive |
| 8.2 | <i>Staphylococcus intermedius</i> | Negative | Positive | Negative | Positive | Positive | Negative | Positive | Positive |

Legend: - represent untested samples for a given gen

**Table S2.** Logistic regression to verify the association between the presence of the gene and resistance to penicillin G and oxacillin.

|                        |        | Penicillin G - Resistant |                |         | Oxacillin - Resistant |               |         |
|------------------------|--------|--------------------------|----------------|---------|-----------------------|---------------|---------|
|                        |        | OR                       | IC-95%         | p-value | OR                    | IC-95%        | p-value |
| All species            | blaZ-c | *                        | *              | *       | *                     | *             | *       |
|                        | femA-c | 0.78                     | (0.09; 6.79)   | 0.51    | 1.53                  | (0.25; 9.55)  | 0.55    |
|                        | mecA-c | 438676.90                | (0.0; 1.17)    | 0.96    | 117878.60             | (0.0; 3.13)   | 0.74    |
|                        | blaZ-p | 2.00                     | (0.07; 54.72)  | 0.52    | 0.97                  | (0.07; 12.47) | 0.94    |
|                        | femA-p | 265873.42                | (0.0; 2.30)    | 0.45    | 0.97                  | (0.12; 7.11)  | 0.61    |
|                        | mecA-p | 6.47                     | (0.07; 641.61) | 0.73    | 0.48                  | (0.06; 3.71)  | 0.71    |
| <i>S. aureus</i>       | femA-p | 1.00                     | (0.0; 3.15)    | 0.99    | 0.00                  | (0.0; 9.28)   | 1.00    |
| subsp. <i>aureus</i>   | mecA-p | 1.00                     | (0.0; 3.51)    | 0.99    | 0.00                  | (0.0; 2.34)   | 0.99    |
| <i>S. auricularis</i>  | femA-c | 1.00                     | (0.0; 1.28)    | 1.00    | 1.00                  | (0.0; 1.28)   | 1.00    |
|                        | blaZ-p | 1.00                     | (0.0; 1.28)    | 0.87    | 1.00                  | (0.0; 1.28)   | 1.00    |
| <i>S. carnosus</i>     | femA-c | *                        | *              | *       | 0.00                  | (0.0; 4.32)   | 0.90    |
|                        | blaZ-p | 286663.11                | (0.0; 7.63)    | 1.00    | 0.00                  | (0.0; 4.32)   | 0.90    |
|                        | femA-p | 1.50                     | (0.0; 5.30)    | 1.00    | 0.00                  | (0.0; 4.32)   | 0.90    |
|                        | mecA-p | *                        | *              | *       | 0.00                  | (0.0; 4.32)   | 0.90    |
| <i>S. haemolyticus</i> | femA-c | 0.96                     | (0.0; 2.61)    | 0.96    | 2.88                  | (0.09; 88.34) | 0.61    |
|                        | mecA-c | 0.00                     | (0.0; 5.24)    | 0.99    | 59848.83              | (0.0; 1.60)   | 1.00    |
|                        | blaZ-p | 0.00                     | (0.0; 1.84)    | 0.97    | *                     | *             | *       |
|                        | femA-p | 5.00                     | (0.0; 4.68)    | 0.94    | 0.82                  | (0.03; 19.75) | 0.99    |
| <i>S. intermedius</i>  | blaZ-p | 105456.47                | (0.0; 4.86)    | 0.95    | 286663.12             | (0.0; 7.63)   | 0.97    |
|                        | femA-p | 1.00                     | (0.02; 50.40)  | 1.00    | 1.00                  | (0.2; 50.40)  | 1.00    |
|                        | mecA-p | *                        | *              | *       | 286663.12             | (0.0; 7.63)   | 0.97    |

\*did not have enough data to calculate such estimates.

-c (chromosomal DNA)

-p (plasmid DNA)

**Table S3.**  $\chi^2$  test for association between the presence of genes and resistance to penicillin G and oxacillin.

|              | Gene   | X <sup>2</sup> | p-value |
|--------------|--------|----------------|---------|
| Oxacillin    | femA-c | 1854.00        | 0.396   |
|              | blaZ-p | 0.19           | 0.909   |
|              | femA-p | 0.70           | 0.705   |
|              | mecA-p | 0.89           | 0.642   |
| Penicillin G | femA-c | 0.58           | 0.75    |
|              | blaZ-p | 0.64           | 0.725   |
|              | femA-p | 3.59           | 0.166   |
|              | mecA-p | 2.37           | 0.306   |

-c (chromosomal DNA)

-p (plasmid DNA)
